# Supplementary material for: Evaluation of the SMARTCHEK Genesystem RT-qPCR assay for the detection of SARS-CoV-2 in clinical samples
Source: Springer Nature journal article supplement (doi:10.1186/s12879-022-07319-0), 2022-04-04
Supplement: MOESM1 [file 20281928]

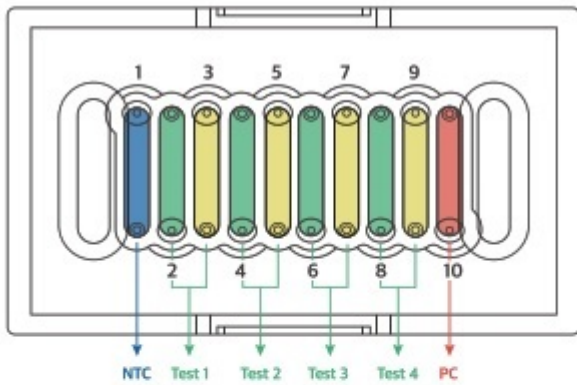

### CONFIGURATION OF TEST CHIP

- Primers and probe for N gene of SARS-CoV-2
- Primers and probe for RdRP gene of SARS-CoV-2
- For running No template control
- For running Positive control

\*Each well includes a internal positive control

### WORKFLOW

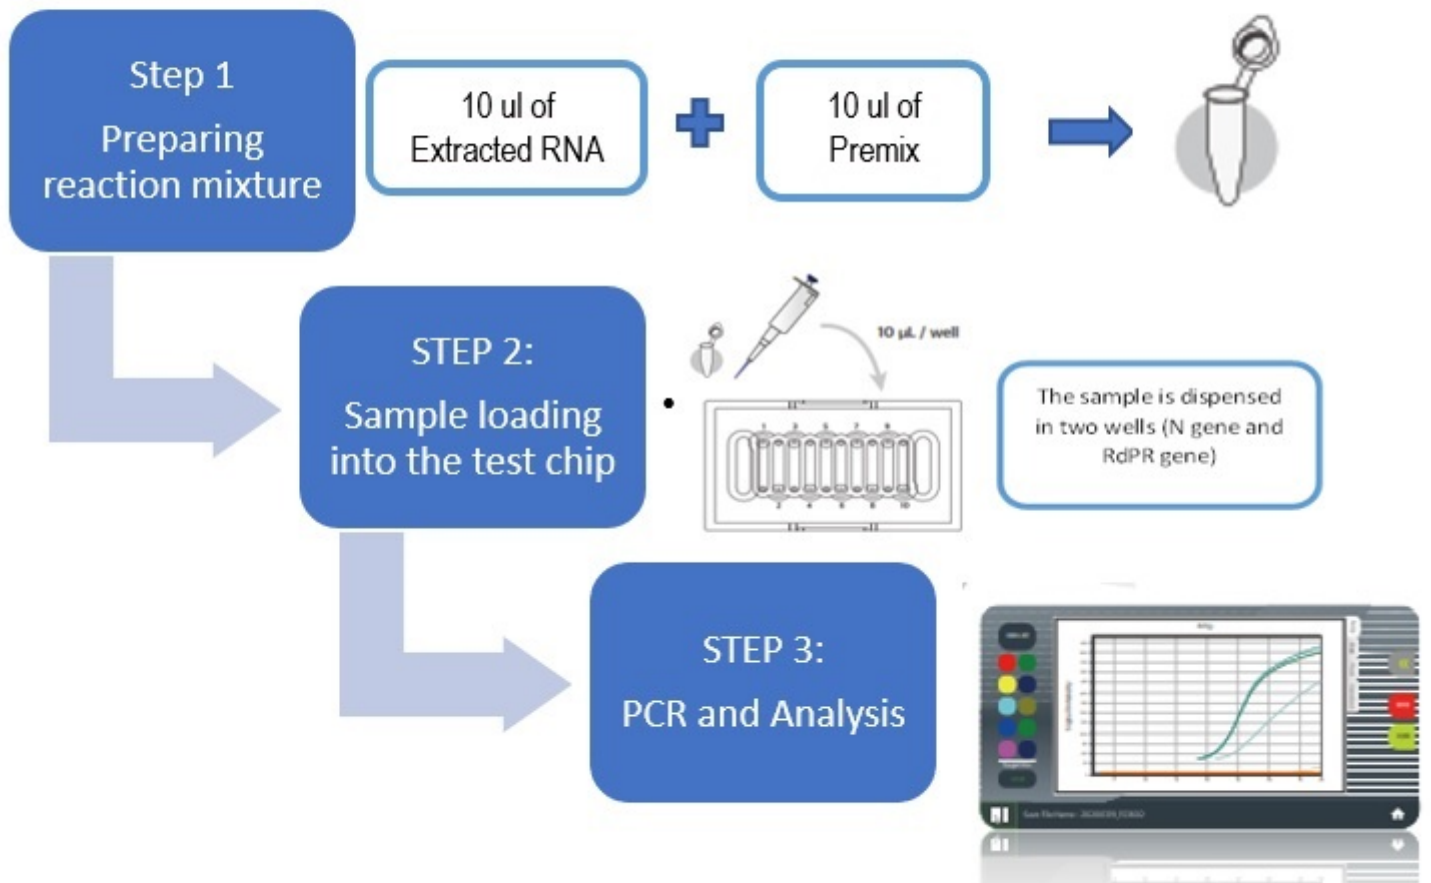

**Fig. S1.** Workflow of RT-qPCR SMARTCHECK
